# Supplementary material for: Flexible Boron-Doped Diamond (BDD) Electrodes for Plant Monitoring
Source: MDPI journal article supplement (doi:10.3390/s17071638), 2017-07-15
Supplement: s1 [file s1]

## **Supplementary data**

### **Flexible Boron-Doped Diamond (BDD) Electrodes for Plant Monitoring**

**Shoko Tago, Tsuyoshi Ochiai, Seitaro Suzuki, Mio Hayashi,  
Takeshi Kondo, and Akira Fujishima**

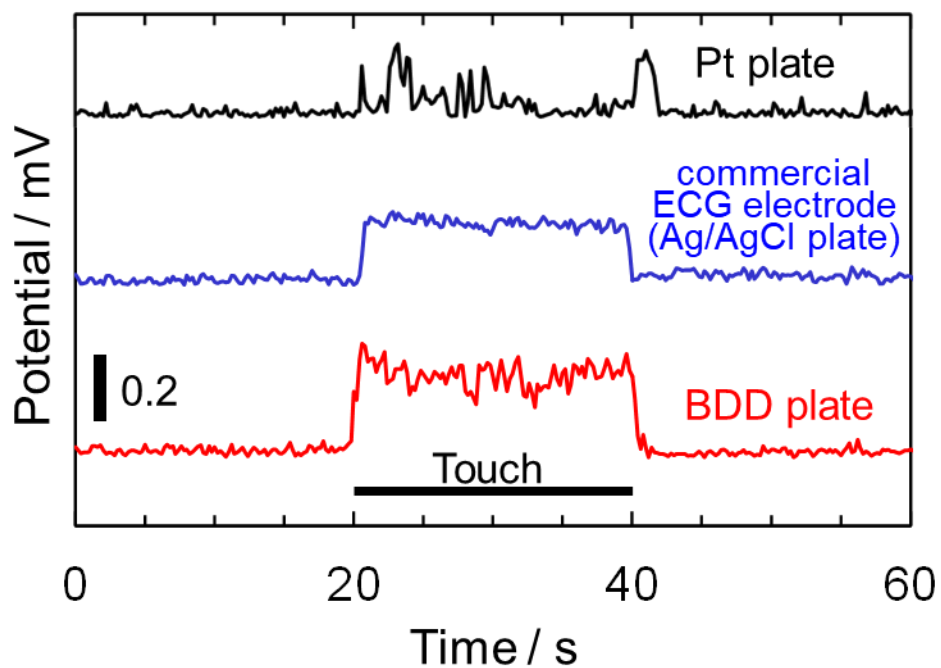

**Figure S1** Potential changes between a pair of Pt, Ag/AgCl and BDD plate electrodes on potted *Opuntia* hybrid for a finger touch lasting 20 s.

Reproduced with permission from *ECS Trans.*, 75, 233 (2016). Copyright 2016 ECS - The Electrochemical Society.

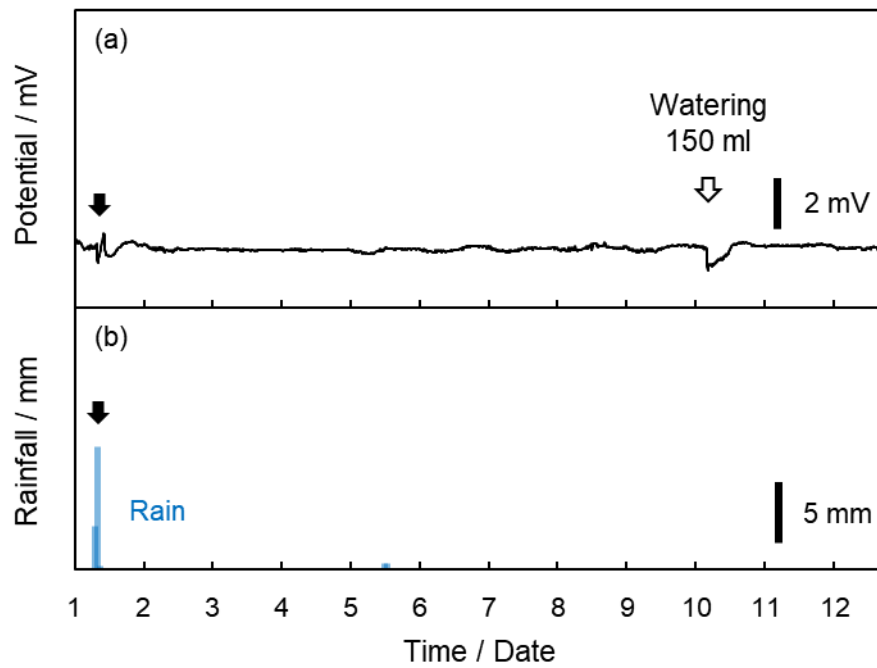

Figure S2 (a) Potential changes between a pair of BDD plate electrodes on *Aloe* during watering and rains over 11 days (from June 1 to June 12, 2017). (b) Rainfall over the same 11 days.
